# Supplementary material for: Predicting Axillary Response in Hormone Receptor-Positive Breast Cancer after Neoadjuvant Chemotherapy Using Real-World Data
Source: Hindawi journal article supplement (doi:10.1155/2022/6972703), 2022-12-21
Supplement: f1 [file 6972703.f1.pdf]

**A**

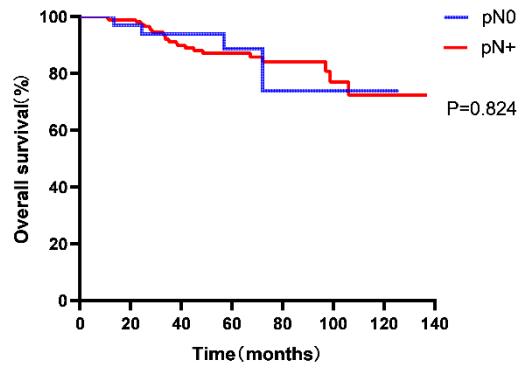

**B**

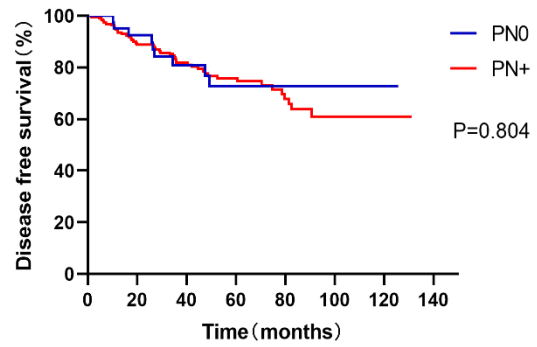

**Figure S1:** **A.** Overall survival according to axillary nodal status after neoadjuvant chemotherapy (NAC), P=0.824; **B.** Disease free survival to axillary nodal status after NAC, P=0.804. pN0 means axillary lymph nodes are pathological complete remission (pCR). pN+ means non-pCR.
